# Supplementary material for: Experiences of US Clinicians Contending With Health Care Resource Scarcity During the COVID-19 Pandemic, December 2020 to December 2021
Source: PubMed Central journal article supplement (PMC10276299; doi:10.1001/jamanetworkopen.2023.18810), 2023-06-16
Supplement: jamanetwopen-e2318810-s001.pdf [file jamanetwopen-e2318810-s001.pdf]

## Data Sharing Statement

Butler. Experiences of US Clinicians Contending With Health Care Resource Scarcity During the COVID-19 Pandemic, December 2020 to December 2021. *JAMA Netw Open*. Published June 16, 2023. doi:10.1001/jamanetworkopen.2023.18810

### Data

**Data available:** No
